# Supplementary material for: The roles of tertiary lymphoid structures in chronic diseases
Source: Springer Nature journal article supplement (doi:10.1038/s41581-023-00706-z), 2023-04-12
Supplement: MOESM1 [file 41581_2023_706_MOESM1_ESM.pdf]

# The roles of tertiary lymphoid structures in chronic diseases

---

In the format provided by the  
authors and unedited

**Supplementary table 1** | Frequency of TLS-positive cases in cohorts of different tumours extracted from studies reporting histological TLS assessment

| Included in organ comparison analysis | Cancer subtype | Organ    | Disease details                                                | Treatment before surgery | total cases analysed | # of TLS+ cases | % of TLS-positive cases | Details on TLS assessment method and region                                                   | Reference                           |
|---------------------------------------|----------------|----------|----------------------------------------------------------------|--------------------------|----------------------|-----------------|-------------------------|-----------------------------------------------------------------------------------------------|-------------------------------------|
| Yes                                   | IBC            | Breast   | Invasive ductal carcinoma, mixed subtypes                      | untreated                | 134                  | 17              | 12.69                   | whole slide H&E, whole tissue area                                                            | 1                                   |
| Yes                                   | DCIS           | Breast   | Ductal carcinoma in situ                                       | untreated                | 68                   | 5               | 7.35                    | whole slide H&E, whole tissue area                                                            | 1                                   |
| Yes                                   | HNSCC          | Tongue   | Oral tongue squamous cell carcinoma                            | untreated                | 310                  | 263             | 84.84                   | whole slide H&E, peritumoral area                                                             | 2                                   |
| Yes                                   | HCC            | Liver    | Hepatocellular carcinoma                                       | untreated                | 273                  | 129             | 47.25                   | whole slide H&E, whole tissue area, TLS assessed intratumorally                               | 3                                   |
| Yes                                   | PDAC           | Pancreas | Pancreatic ductal adenocarcinoma                               | untreated                | 104                  | 101             | 97.12                   | whole slide IHC for CD20, tumor-stroma interface                                              | 4                                   |
| Yes                                   | TNBC           | Breast   | Metaplastic breast cancer (triple negative breast cancer-like) | untreated                | 60                   | 36              | 60.00                   | whole slide H&E, whole tissue area, number of positive cases extrapolated from survival graph | 5                                   |
| Yes                                   | NSCLC          | Lung     | Non-small cell lung cancer, early stage                        | untreated                | 74                   | 64              | 86.49                   | whole slide H&E and IHC for DC-LAMP and CD3, whole tissue area                                | 6                                   |
| Yes                                   | BC_HER2-       | Breast   | HER2- invasive breast cancer and ductal carcinoma in situ      | untreated                | 210                  | 69              | 32.86                   | whole slide H&E and IHC for CD20, CD3, CD21, BCL6, PNAD, whole tissue area                    | 7                                   |
| Yes                                   | BC_HER2+       | Breast   | HER2+ invasive breast cancer and ductal carcinoma in situ      | untreated                | 40                   | 26              | 65.00                   | whole slide H&E and IHC for CD20, CD3, CD21, BCL6, PNAD, whole tissue area                    | 7                                   |
| Yes                                   | BC_HER2-       | Breast   | ER- invasive breast cancer and ductal carcinoma in situ        | untreated                | 41                   | 31              | 75.61                   | whole slide H&E and IHC for CD20, CD3, CD21, BCL6, PNAD, whole tissue area                    | 7                                   |
| Yes                                   | BC_HER2-       | Breast   | PR- invasive breast cancer and ductal carcinoma in situ        | untreated                | 56                   | 36              | 64.29                   | whole slide H&E and IHC for CD20, CD3, CD21, BCL6, PNAD, whole tissue area                    | 7                                   |
| Yes                                   | BC_HER2+       | Breast   | ER+ invasive breast cancer and ductal carcinoma in situ        | untreated                | 208                  | 64              | 30.77                   | whole slide H&E and IHC for CD20, CD3, CD21, BCL6, PNAD, whole tissue area                    | 7                                   |
| Yes                                   | BC_HER2+       | Breast   | PR+ invasive breast cancer and ductal carcinoma in situ        | untreated                | 120                  | 38              | 31.67                   | whole slide H&E and IHC for CD20, CD3, CD21, BCL6, PNAD, whole tissue area                    | 7                                   |
| Yes                                   | HNSCC          | Larynx   | laryngeal squamous cell carcinoma                              | untreated                | 24                   | 5               | 20.83                   | whole slide H&E, whole tissue area                                                            | 8                                   |
| Yes                                   | NSCLC          | Lung     | Non-small cell lung cancer                                     | untreated                | 147                  | 86              | 58.50                   | whole slide IHC for PNAD next to dense lymphocytic clusters, 10 40x regions per slide         | 9                                   |
| Yes                                   | HCC            | Liver    | Hepatocellular carcinoma                                       | untreated                | 112                  | NA              | 33.00                   | whole slide multiplexIF, whole tissue area                                                    | 10                                  |
| Yes                                   | NSCLC          | Lung     | Non-small cell lung cancer                                     | untreated                | 103                  | 80              | 77.67                   | whole slide H&E, whole tissue area                                                            | 11                                  |
| Yes                                   | PDAC_TMBhi     | Pancreas | Pancreatic ductal adenocarcinoma, SHM high (>10)               | untreated                | 17                   | 14              | 82.35                   | whole slide IHC for CD20 and CD3, multiplex IF, whole tissue area                             | 12                                  |
| Yes                                   | PDAC_TMBlo     | Pancreas | Pancreatic ductal adenocarcinoma, SHM low (<=10)               | untreated                | 42                   | 5               | 11.90                   | whole slide IHC for CD20 and CD3, multiplex IF, whole tissue area                             | 12                                  |
| Yes                                   | PDAC           | Pancreas | Pancreatic ductal adenocarcinoma                               | untreated                | 174                  | 44              | 25.29                   | whole slide H&E, whole tissue area                                                            | 12                                  |
| Yes                                   | BC_HER2-       | Breast   | HR- invasive breast cancer                                     | untreated                | 41                   | 19              | 46.34                   | whole slide IHC for CD20, whole tissue area                                                   | 10.3969/j.issn.1673-4254.2013.05.25 |
| Yes                                   | BC_HER2+       | Breast   | HR+ invasive breast cancer                                     | untreated                | 89                   | 30              | 33.71                   | whole slide IHC for CD20, whole tissue area                                                   | 10.3969/j.issn.1673-4254.2013.05.25 |
| Yes                                   | GACA           | Stomach  | Gastric adenocarcinoma, intestinal type                        | untreated                | 6                    | 6               | 100.00                  | whole slide IHC for CD20, whole tissue area                                                   | 13                                  |
| Yes                                   | PDAC           | Pancreas | Pancreatic ductal adenocarcinoma                               | untreated                | 308                  | 308             | 100.00                  | whole slide H&E, whole tissue area                                                            | 14                                  |

|     |            |                   |                                               |           |     |     |        |                                                                        |    |
|-----|------------|-------------------|-----------------------------------------------|-----------|-----|-----|--------|------------------------------------------------------------------------|----|
| Yes | TNBC       | Breast            | Triple negative breast cancer                 | untreated | 42  | 21  | 50.00  | whole slide IHC for CD21, CD20, whole tissue area                      | 15 |
| Yes | NSCLC      | Lung              | Lung adenocarcinoma                           | untreated | 146 | 57  | 39.04  | whole slide H&E, whole tissue area                                     | 16 |
| Yes | MIBC       | Bladder           | Muscle invasive bladder cancer                | untreated | 16  | 13  | 81.25  | whole slide multiplex IHC, whole tissue area                           | 17 |
| Yes | NonMIBC    | Bladder           | Non- Muscle invasive bladder cancer           | untreated | 12  | 9   | 75.00  | whole slide multiplex IHC, whole tissue area                           | 17 |
| Yes | OVCA       | Ovary and omentum | High-grade serous ovarian cancer              | untreated | 30  | 17  | 56.67  | whole slide multiplex IHC, whole tissue area                           | 18 |
| Yes | TNBC       | Breast            | Triple negative breast cancer                 | untreated | 769 | 733 | 95.32  | whole slide H&E, whole tissue area                                     | 19 |
| Yes | BC_HER2+   | Breast            | HER2+ invasive breast cancer                  | untreated | 447 | 402 | 89.93  | whole slide H&E, whole tissue area, TLS found peritumorally            | 20 |
| Yes | BC_HER2-   | Breast            | HR-HER2+ invasive breast cancer               | untreated | 240 | 186 | 77.50  | whole slide H&E, whole tissue area, TLS found peritumorally            | 20 |
| Yes | BC_HR+     | Breast            | HR+HER2+ invasive breast cancer               | untreated | 207 | 116 | 56.04  | whole slide H&E, whole tissue area, TLS found peritumorally            | 20 |
| Yes | BC_HER2+   | Breast            | HER2+ invasive breast cancer                  | untreated | 168 | 65  | 38.69  | whole slide H&E, whole tissue area                                     | 21 |
| Yes | BC_HER2-   | Breast            | HR-HER2+ invasive breast cancer               | untreated | 78  | NA  | 43.59  | whole slide H&E, whole tissue area                                     | 21 |
| Yes | BC_HR+     | Breast            | HR+HER2+ invasive breast cancer               | untreated | 90  | NA  | 34.44  | whole slide H&E, whole tissue area                                     | 21 |
| Yes | BC_HER2-   | Breast            | HER2- invasive breast cancer                  | untreated | 191 | 59  | 30.89  | whole slide H&E and IHC for CD20, CD3, CD23, whole tissue area         | 22 |
| Yes | BC_HER2+   | Breast            | HER2+ invasive breast cancer                  | untreated | 54  | 33  | 61.11  | whole slide H&E and IHC for CD20, CD3, CD23, whole tissue area         | 22 |
| Yes | BC_HR-     | Breast            | ER- invasive breast cancer                    | untreated | 89  | 46  | 51.69  | whole slide H&E and IHC for CD20, CD3, CD23, whole tissue area         | 22 |
| Yes | BC_HR-     | Breast            | PR- invasive breast cancer                    | untreated | 95  | 50  | 52.63  | whole slide H&E and IHC for CD20, CD3, CD23, whole tissue area         | 22 |
| Yes | BC_HR+     | Breast            | ER+ invasive breast cancer                    | untreated | 157 | 46  | 29.30  | whole slide H&E and IHC for CD20, CD3, CD23, whole tissue area         | 22 |
| Yes | BC_HR+     | Breast            | PR+ invasive breast cancer                    | untreated | 150 | 42  | 28.00  | whole slide H&E and IHC for CD20, CD3, CD23, whole tissue area         | 22 |
| Yes | TNBC       | Breast            | Triple negative breast cancer                 | untreated | 45  | 22  | 48.89  | whole slide H&E and IHC for CD20, CD3, CD23, whole tissue area         | 22 |
| Yes | MIBC       | Bladder           | Urinary bladder                               | untreated | 51  | 28  | 54.90  | 3mm TMA cores with TC and IM by IF, sequential IHC                     | 23 |
| Yes | RCC        | Kidney            | Clear cell renal cell carcinoma               | untreated | 105 | 33  | 31.43  | IF on 3mm TMA cores with TC and IM, sequential IHC                     | 23 |
| Yes | CRC        | Liver             | Metastatic colorectal cancer                  | untreated | 14  | 12  | 85.71  | whole slide IHC for CD20, whole tissue area, TLS present peritumorally | 24 |
| Yes | CRC        | Colon             | Colorectal cancer                             | untreated | 843 | 230 | 27.28  | whole slide H&E, whole tissue area, TLS present peritumorally          | 25 |
| Yes | MIBC_TMBhi | Bladder           | Muscle invasive bladder cancer, mutation high | untreated | 151 | 117 | 77.48  | whole slide H&E, whole tissue area                                     | 26 |
| Yes | MIBC_TMBlo | Bladder           | Muscle invasive bladder cancer, mutation low  | untreated | 153 | 107 | 69.93  | whole slide H&E, whole tissue area                                     | 26 |
| Yes | MIBC       | Bladder           | Muscle invasive bladder cancer                | untreated | 40  | 40  | 100.00 | whole slide multiplexIF, whole tissue area                             | 26 |
| Yes | CRC_TMBhi  | Colon             | Colorectal cancer, microsatellite instable    | untreated | 15  | 15  | 100.00 | whole slide multiplexIF, peritumoral area                              | 27 |
| Yes | CRC_TMBlo  | Colon             | Colorectal cancer, microsatellite stable      | untreated | 94  | 91  | 96.81  | whole slide multiplexIF, peritumoral area                              | 27 |

|     |            |                                                  |                                                                          |                        |      |     |        |                                                                            |    |
|-----|------------|--------------------------------------------------|--------------------------------------------------------------------------|------------------------|------|-----|--------|----------------------------------------------------------------------------|----|
| Yes | CRC_TMBhi  | Colon                                            | Colorectal cancer, microsatellite instable                               | untreated              | 189  | 111 | 58.73  | whole slide H&E, whole tissue area                                         | 28 |
| Yes | CRC_TMBlo  | Colon                                            | Colorectal cancer, microsatellite stable                                 | untreated              | 1299 | 588 | 45.27  | whole slide H&E, whole tissue area                                         | 28 |
| Yes | HNSCC_HPV- | Tongue                                           | HPV- head and neck squamous cell carcinoma                               | untreated              | 13   | 13  | 100.00 | whole slide IHC for CD20, whole tissue area                                | 29 |
| Yes | HNSCC_HPV- | Tonsil                                           | HPV- head and neck squamous cell carcinoma                               | untreated              | 18   | 18  | 100.00 | whole slide IHC for CD20, whole tissue area                                | 29 |
| Yes | HNSCC_HPV+ | Tongue                                           | HPV+ head and neck squamous cell carcinoma                               | untreated              | 15   | 12  | 80.00  | whole slide IHC for CD20, whole tissue area                                | 29 |
| Yes | HNSCC_HPV+ | Tonsil                                           | HPV+ head and neck squamous cell carcinoma                               | untreated              | 10   | 9   | 90.00  | whole slide IHC for CD20, whole tissue area                                | 29 |
| Yes | NSCLC      | Lung                                             | Lung squamous cell carcinoma                                             | untreated              | 69   | 68  | 98.55  | whole slide H&E, peritumoral area                                          | 30 |
| Yes | BC_HER2+   | Breast                                           | HER2+ invasive ductal cancer                                             | untreated              | 48   | 48  | 100.00 | whole slide H&E and IHC for CD20, CD3, CD23, whole tissue area             | 31 |
| Yes | TNBC       | Breast                                           | Triple negative breast cancer                                            | untreated              | 20   | 18  | 90.00  | whole slide H&E and IHC for CD20, CD3, CD23, whole tissue area             | 31 |
| Yes | OVCA       | Ovary and omentum                                | High-grade serous ovarian cancer                                         | untreated              | 147  | 14  | 9.52   | whole slide IHC for CD20 and DC-LAMP, whole tissue area                    | 32 |
| Yes | OVCA       | Ovary and omentum                                | High-grade serous ovarian cancer                                         | untreated              | 62   | 39  | 62.90  | whole slide IHC for CD20, whole tissue area                                | 33 |
| Yes | OVCA       | Ovary and omentum                                | High-grade serous ovarian cancer                                         | untreated              | 35   | 22  | 62.86  | whole slide IHC for CD20, whole tissue area                                | 33 |
| Yes | MIBC       | Bladder                                          | Muscle invasive bladder cancer                                           | untreated              | 31   | 25  | 80.65  | whole slide multiplex IF, whole tissue area, most TLS peritumorally        | 34 |
| Yes | CRC        | Colon                                            | Colorectal cancer                                                        | untreated              | 418  | 411 | 98.33  | whole slide H&E, whole tissue area, TLS present peritumorally              | 35 |
| Yes | HNSCC_HPV- | Oral cavity excluding base of tongue and tonsils | HPV- oral squamous cell carcinoma                                        | untreated              | 68   | 16  | 23.53  | whole slide IHC for CD20, CD21, BCL6, whole tissue area                    | 36 |
| Yes | HNSCC_HPV+ | Oral cavity excluding base of tongue and tonsils | HPV+ oral squamous cell carcinoma                                        | untreated              | 6    | 1   | 16.67  | whole slide IHC for CD20, CD21, BCL6, whole tissue area                    | 36 |
| Yes | CRC        | Colon                                            | Colorectal cancer                                                        | untreated              | 67   | 58  | 86.57  | multiplex IF, whole tissue area, TLS present peritumorally                 | 37 |
| Yes | NSCLC      | Lung                                             | Lung adenocarcinoma, without ALK rearrangement and driver gene mutations | untreated              | 9    | 8   | 88.89  | whole slide IHC for CD20, whole tissue area                                | 38 |
| Yes | NSCLC      | Lung                                             | Lung adenocarcinoma, with ALK rearrangement                              | untreated              | 39   | 30  | 76.92  | whole slide IHC for CD20, whole tissue area                                | 38 |
| Yes | HCC        | Liver                                            | Hepatocellular carcinoma                                                 | untreated              | 170  | 142 | 83.53  | whole slide H&E, peritumoral area                                          | 39 |
| No  |            | Breast                                           | Invasive ductal carcinoma, mixed subtypes                                | Chemotherapy           | 35   | 0   | 0.00   | whole slide H&E, whole tissue area                                         | 1  |
| No  |            | Breast                                           | Invasive ductal carcinoma, mixed subtypes                                | untreated+chemotherapy | 312  | 37  | 11.86  | whole slide H&E, whole tissue area                                         | 1  |
| No  |            | Prostate                                         | Prostate adenocarcinoma                                                  | untreated              | 17   | NA  | NA     | whole slide H&E, whole tissue area                                         | 40 |
| No  |            | Breast                                           | invasive breast cancer and ductal carcinoma in situ                      | untreated              | 290  | 146 | 50.34  | whole slide H&E and IHC for CD20, CD3, CD21, BCL6, PNAD, whole tissue area | 7  |
| No  |            | Lung                                             | Non-small cell lung cancer, advanced stage                               | Chemotherapy           | 122  | NA  | NA     | whole slide IHC for DC-LAMP and CD20, whole tissue area                    | 41 |
| No  |            | Lung                                             | Non-small cell lung cancer, early stage                                  | untreated              | 74   | NA  | NA     | whole slide IHC for DC-LAMP and CD20, whole tissue area                    | 41 |

|    |          |                                                    |                        |      |     |       |                                                                        |                                     |
|----|----------|----------------------------------------------------|------------------------|------|-----|-------|------------------------------------------------------------------------|-------------------------------------|
| No | Lung     | Non-small cell lung cancer without underlying COPD | untreated              | 376  | NA  | NA    | whole slide IHC for DC-LAMP and CD8, whole tissue area                 | 42                                  |
| No | Lung     | Non-small cell lung cancer                         | NA                     | 91   | NA  | NA    | whole slide H&E, whole tissue area                                     | 43                                  |
| No | Breast   | Invasive breast cancer, mixed subtypes             | untreated              | 70   | NA  | NA    | whole slide IHC, Tfh used as surrogate for TLS, whole tissue area      | 44                                  |
| No | Pancreas | Pancreatic ductal adenocarcinoma, SHM high + low   | untreated              | 63   | 29  | 46.03 | whole slide IHC for CD20 and CD3, multiplex IF, whole tissue area      | 12                                  |
| No | Breast   | Invasive breast cancer, mixed subtypes             | untreated              | 130  | 49  | 37.69 | whole slide IHC for CD20, whole tissue area                            | 10.3969/j.issn.1673-4254.2013.05.25 |
| No | Stomach  | Gastric adenocarcinoma                             | untreated              | 1033 | NA  | NA    | whole slide H&E and IHC for CD20, CD21, whole tissue area              | 45                                  |
| No | Stomach  | Gastric adenocarcinoma                             | Chemotherapy           | 42   | NA  | NA    | whole slide IHC for CD20, whole tissue area                            | 46                                  |
| No | Stomach  | Gastric adenocarcinoma                             | untreated              | 40   | NA  | NA    | whole slide IHC for CD20, whole tissue area                            | 46                                  |
| No | Stomach  | Gastritis with intestinal metaplasia, non-tumor    | untreated              | 10   | 0   | 0.00  | whole slide IHC for CD20, whole tissue area                            | 13                                  |
| No | Brain    | Metastatic breast cancer                           | untreated+chemotherapy | 37   | 0   | 0.00  | whole slide H&E, whole tissue area                                     | 47                                  |
| No | Breast   | Metastatic breast cancer, primary tumor            | untreated+chemotherapy | 245  | 112 | 45.71 | whole slide H&E, whole tissue area                                     | 47                                  |
| No | Liver    | Metastatic breast cancer                           | untreated+chemotherapy | 84   | 13  | 15.48 | whole slide H&E, whole tissue area                                     | 47                                  |
| No | Lung     | Metastatic breast cancer                           | untreated+chemotherapy | 127  | 48  | 37.80 | whole slide H&E, whole tissue area                                     | 47                                  |
| No | Ovary    | Metastatic breast cancer                           | untreated+chemotherapy | 25   | 0   | 0.00  | whole slide H&E, whole tissue area                                     | 47                                  |
| No | Liver    | Hepatocellular carcinoma                           | untreated              | 303  | 102 | 33.66 | TMA H&E, intratumoral area                                             | 48                                  |
| No | Liver    | Hepatocellular carcinoma                           | untreated              | 159  | 54  | 33.96 | TMA H&E, intratumoral area                                             | 48                                  |
| No | Liver    | Hepatic hemangioma, non-tumor                      | untreated              | 50   | 4   | 8.00  | TMA H&E, whole tissue                                                  | 48                                  |
| No | Breast   | Invasive breast cancer, mixed subtypes             | untreated              | 255  | 101 | 39.61 | whole slide H&E and IHC for CD20, CD3, CD23, whole tissue area         | 22                                  |
| No | Rectum   | Rectal cancer                                      | untreated              | 60   | NA  | NA    | whole slide IHC of CD3, CD83, whole tissue area, TLS peritumorally     | 49                                  |
| No | Liver    | Metastatic colorectal cancer                       | Chemotherapy           | 51   | 33  | 64.71 | whole slide IHC for CD20, whole tissue area, TLS present peritumorally | 24                                  |
| No | Liver    | Metastatic colorectal cancer                       | untreated+chemotherapy | 65   | 45  | 69.23 | whole slide IHC for CD20, whole tissue area, TLS present peritumorally | 24                                  |
| No | Omentum  | High-grade serous ovarian cancer                   | Chemotherapy           | 31   | NA  | NA    | whole slide IHC for CD20, whole tissue area                            | 50                                  |
| No | Omentum  | High-grade serous ovarian cancer                   | untreated              | 10   | NA  | NA    | whole slide IHC for CD20, whole tissue area                            | 50                                  |
| No | Liver    | Hepatocellular carcinoma                           | untreated              | 145  | 59  | 40.69 | whole slide IHC for CD3, CD8, CD20, CD208, CD21, intratumoral area     | 51                                  |
| No | Liver    | Hepatocellular carcinoma                           | untreated              | 120  | 48  | 40.00 | whole slide IHC for CD3, CD8, CD20, CD208, CD21, intratumoral area     | 51                                  |
| No | Bladder  | Muscle invasive bladder cancer                     | untreated              | 300  | 58  | 19.33 | whole slide H&E, intratumoral area                                     | 26                                  |
| No | Bladder  | Muscle invasive bladder cancer, mutation low+high  | untreated              | 304  | 223 | 73.36 | whole slide H&E, whole tissue area                                     | 26                                  |
| No | Bladder  | Muscle invasive bladder cancer                     | Chemotherapy           | 30   | 29  | 96.67 | whole slide multiplexIF, whole tissue area                             | 26                                  |

|    |                                                  |                                                       |                                   |      |     |        |                                                                 |    |
|----|--------------------------------------------------|-------------------------------------------------------|-----------------------------------|------|-----|--------|-----------------------------------------------------------------|----|
| No | Colon                                            | Colorectal cancer, microsatellite stable and unstable | untreated                         | 109  | 106 | 97.25  | whole slide multiplexIF, peritumoral area                       | 27 |
| No | Lung                                             | Non-small cell lung cancer, advanced stage            | Chemotherapy                      | 122  | NA  | NA     | whole slide IHC for DC-LAMP and CD8, whole tissue area          | 52 |
| No | Lung                                             | Non-small cell lung cancer, advanced stage            | untreated                         | 39   | NA  | NA     | whole slide IHC for DC-LAMP and CD8, whole tissue area          | 52 |
| No | Lung                                             | Metastatic colorectal cancer                          | untreated                         | 140  | NA  | NA     | whole slide IHC for DC-LAMP and CD8, whole tissue area          | 52 |
| No | Lung                                             | Metastatic renal cell carcinoma                       | untreated                         | 52   | NA  | NA     | whole slide IHC for DC-LAMP and CD8, whole tissue area          | 52 |
| No | Colon                                            | Colorectal cancer, microsatellite stable and unstable | untreated                         | 1663 | 784 | 47.14  | whole slide H&E, whole tissue area                              | 28 |
| No | Tonsil and base of Tongue                        | HPV- head and neck squamous cell carcinoma            | untreated                         | 25   | 25  | 100.00 | whole slide IHC for CD20, whole tissue area                     | 29 |
| No | Tonsil and base of Tongue                        | HPV+ head and neck squamous cell carcinoma            | untreated                         | 25   | 21  | 84.00  | whole slide IHC for CD20, whole tissue area                     | 29 |
| No | Lung                                             | Metastatic colorectal cancer                          | untreated+chemotherapy            | 57   | 45  | 78.95  | whole slide IHC of CD8, FOXP3 whole tissue area                 | 53 |
| No | Lung                                             | Lung squamous cell carcinoma                          | Chemotherapy                      | 51   | 47  | 92.16  | whole slide H&E, peritumoral area                               | 30 |
| No | Lung                                             | Lung squamous cell carcinoma                          | tumor non-related corticosteroids | 18   | 18  | 100.00 | whole slide H&E, peritumoral area                               | 30 |
| No | Lung                                             | Lung squamous cell carcinoma                          | untreated+chemotherapy            | 138  | 133 | 96.38  | whole slide H&E, whole tissue area                              | 30 |
| No | Breast                                           | Invasive ductal carcinoma, mixed subtypes             | untreated                         | 167  | 148 | 88.62  | whole slide H&E and IHC for CD20, CD3, CD23, whole tissue area  | 31 |
| No | Breast                                           | Triple negative breast cancer                         | Chemotherapy                      | 108  | 93  | 86.11  | whole slide H&E, whole tissue area                              | 54 |
| No | Lung                                             | Non-small cell lung cancer with underlying COPD       | Brochodilators                    | 90   | NA  | NA     | whole slide IHC for CD20 and CD3, whole tissue area             | 55 |
| No | Lung                                             | Non-small cell lung cancer without underlying COPD    | untreated                         | 43   | NA  | NA     | whole slide IHC for CD20 and CD3, whole tissue area             | 55 |
| No | Ovary and omentum                                | High-grade serous ovarian cancer                      | untreated                         | 97   | 61  | 62.89  | whole slide IHC for CD20, whole tissue area                     | 33 |
| No | Colon                                            | Colorectal cancer                                     | Chemotherapy or RT                | 32   | NA  | NA     | whole slide H&E, whole tissue area, TLS present peritumorally   | 35 |
| No | Colon                                            | Colorectal cancer                                     | untreated                         | 117  | NA  | NA     | whole slide H&E, whole tissue area, TLS present peritumorally   | 35 |
| No | Colon                                            | Colorectal cancer                                     | untreated+chemotherapy+RT         | 149  | 147 | 98.66  | whole slide H&E, whole tissue area, TLS present peritumorally   | 35 |
| No | Liver                                            | Hepatocellular carcinoma                              | untreated                         | 163  | 10  | 6.13   | whole slide H&E, whole tissue area, TLS assessed intratumorally | 56 |
| No | Oral cavity excluding base of tongue and tonsils | Oral squamous cell carcinoma, mixed HPV               | untreated                         | 80   | 17  | 21.25  | whole slide IHC for CD20, CD21, BCL6, whole tissue area         | 36 |
| No | Lung                                             | Lung adenocarcinoma, mixed ALK status                 | untreated                         | 48   | 38  | 79.17  | whole slide IHC for CD20, whole tissue area                     | 38 |
| No | Liver                                            | Hepatocellular carcinoma                              | untreated                         | 170  | 73  | 42.94  | whole slide H&E, intratumoral area                              | 39 |

## Reference list

1. Acar, E., Esendağlı, G., Yazıcı, O. & Dursun, A. Tumor-Infiltrating Lymphocytes (TIL), Tertiary Lymphoid Structures (TLS), and Expression of PD-1, TIM-3, LAG-3 on TIL in Invasive and In Situ Ductal Breast Carcinomas and Their Relationship with Prognostic Factors. *Clin Breast Cancer* **22**, e901–e915 (2022).
2. Almangush, A. *et al.* Tertiary lymphoid structures associate with improved survival in early oral tongue cancer. *BMC Cancer* **22**, 1108 (2022).
3. Calderaro, J. *et al.* Intra-tumoral tertiary lymphoid structures are associated with a low risk of early recurrence of hepatocellular carcinoma. *J Hepatol* **70**, 58–65 (2019).
4. Castino, G. F. *et al.* Spatial distribution of B cells predicts prognosis in human pancreatic adenocarcinoma. *Oncoimmunology* **5**, e1085147 (2016).
5. Chao, X. *et al.* Immune parameters associated with survival in metaplastic breast cancer. *Breast Cancer Research* **22**, 92 (2020).
6. Dieu-Nosjean, M. C. *et al.* Long-term survival for patients with non-small-cell lung cancer with intratumoral lymphoid structures. *J Clin Oncol* **26**, 4410–4417 (2008).
7. Figenschau, S. L., Fismen, S., Fenton, K. A., Fenton, C. & Mortensen, E. S. Tertiary lymphoid structures are associated with higher tumor grade in primary operable breast cancer patients. *BMC Cancer* **15**, 101 (2015).
8. Franz, L. *et al.* Postoperative radiotherapy for laryngeal cancer. The prognostic role of programmed death-ligand 1: An immune microenvironment-based cluster analysis. *Pathol Res Pract* **216**, 153120 (2020).
9. Fukuhara, M. *et al.* The clinical significance of tertiary lymphoid structure and its relationship with peripheral blood characteristics in patients with surgically resected non-small cell lung cancer: a single-center, retrospective study. *Cancer Immunology, Immunotherapy* **71**, 1129–1137 (2022).
10. Garnelo, M. *et al.* Interaction between tumour-infiltrating B cells and T cells controls the progression of hepatocellular carcinoma. *Gut* (2015) doi:10.1136/gutjnl-2015-310814.
11. Giatromanolaki, A., Chatzipantelis, P., Contrafouris, C. A. & Koukourakis, M. I. Tertiary Lymphoid Structures, Immune Response, and Prognostic Relevance in Non-Small Cell Lung Cancer. *Cancer Invest* **41**, 48–57 (2023).
12. Gunderson, A. J. *et al.* Germinal center reactions in tertiary lymphoid structures associate with neoantigen burden, humoral immunity and long-term survivorship in pancreatic cancer. *Oncoimmunology* **10**, 1900635 (2021).
13. Hill, D. G. *et al.* Hyperactive gp130/STAT3-driven gastric tumorigenesis promotes submucosal tertiary lymphoid structure development. *Int J Cancer* **143**, 167–178 (2018).
14. Hiraoka, N. *et al.* Intratumoral tertiary lymphoid organ is a favourable prognosticator in patients with pancreatic cancer. *Br J Cancer* **112**, 1782–1790 (2015).
15. Jézéquel, P. *et al.* Identification of three subtypes of triple-negative breast cancer with potential therapeutic implications. *Breast Cancer Research* **21**, 65 (2019).
16. Kim, A. *et al.* The prognostic significance of tumor-infiltrating lymphocytes assessment with hematoxylin and eosin sections in resected primary lung adenocarcinoma. *PLoS One* **14**, e0224430 (2019).
17. Koti, M. *et al.* Tertiary Lymphoid Structures Associate with Tumour Stage in Urothelial Bladder Cancer. *Bladder Cancer* **3**, 259–267 (2017).
18. Kroeger, D. R., Milne, K. & Nelson, B. H. Tumor-Infiltrating Plasma Cells Are Associated with Tertiary Lymphoid Structures, Cytolytic T-Cell Responses, and Superior Prognosis in Ovarian Cancer. *Clin Cancer Res* **22**, 3005–3015 (2016).
19. Lee, H. J. *et al.* Tertiary lymphoid structures: prognostic significance and relationship with tumour-infiltrating lymphocytes in triple-negative breast cancer. *J Clin Pathol* **69**, 422–430 (2016).
20. Lee, H. J. *et al.* Prognostic Significance of Tumor-Infiltrating Lymphocytes and the Tertiary Lymphoid Structures in HER2-Positive Breast Cancer Treated With Adjuvant Trastuzumab. *Am J Clin Pathol* **144**, 278–288 (2015).
21. Lee, S. J. *et al.* Expression of Myxovirus Resistance A (MxA) Is Associated with Tumor-Infiltrating Lymphocytes in Human Epidermal Growth Factor Receptor 2 (HER2)-Positive Breast Cancers. *Cancer Res Treat* **49**, 313–321 (2017).
22. Liu, X. *et al.* Distinct Tertiary Lymphoid Structure Associations and Their Prognostic Relevance in HER2 Positive and Negative Breast Cancers. *Oncologist* **22**, 1316–1324 (2017).
23. Masuda, T. *et al.* Unique characteristics of tertiary lymphoid structures in kidney clear cell carcinoma: prognostic outcome and comparison with bladder cancer. *J Immunother Cancer* **10**, e003883 (2022).
24. Meshcheryakova, A. *et al.* B cells and ectopic follicular structures: novel players in anti-tumor programming with prognostic power for patients with metastatic colorectal cancer. *PLoS One* **9**, e99008 (2014).
25. Ogino, S. *et al.* Lymphocytic reaction to colorectal cancer is associated with longer survival, independent of lymph node count, microsatellite instability, and CpG island methylator phenotype. *Clin Cancer Res* **15**, 6412–6420 (2009).
26. Pagliarulo, F. *et al.* Molecular, Immunological, and Clinical Features Associated With Lymphoid Neogenesis in Muscle Invasive Bladder Cancer. *Front Immunol* **12**, (2022).
27. Posch, F. *et al.* Maturation of tertiary lymphoid structures and recurrence of stage II and III colorectal cancer. *Oncoimmunology* **7**, e1378844 (2018).
28. Rozek, L. S. *et al.* Tumor-Infiltrating lymphocytes, Crohn's-like lymphoid reaction, and survival from colorectal cancer. *J Natl Cancer Inst* (2016) doi:10.1093/jnci/djw027.
29. Ruffin, A. T. *et al.* B cell signatures and tertiary lymphoid structures contribute to outcome in head and neck squamous cell carcinoma. *Nat Commun* **12**, 3349 (2021).
30. Silina, K. *et al.* Germinal centers determine the prognostic relevance of tertiary lymphoid structures and are impaired by corticosteroids in lung squamous cell carcinoma. *Cancer Res* **78**, 1308–1320 (2018).
31. Sofopoulos, M. *et al.* The prognostic significance of peritumoral tertiary lymphoid structures in breast cancer. *Cancer Immunology, Immunotherapy* **68**, 1733–1745 (2019).
32. Truxova, I. *et al.* Mature dendritic cells correlate with favorable immune infiltrate and improved prognosis in ovarian carcinoma patients. *J Immunother Cancer* **6**, 139 (2018).
33. Ukita, M. *et al.* CXCL13-producing CD4+ T cells accumulate in the early phase of tertiary lymphoid structures in ovarian cancer. *JCI Insight* **7**, (2022).
34. Dijk, N. van *et al.* The Tumor Immune Landscape and Architecture of Tertiary Lymphoid Structures in Urothelial Cancer. *Front Immunol* **12**, (2021).
35. Väyrynen, J. P. *et al.* Characteristics and significance of colorectal cancer associated lymphoid reaction. *Int J Cancer* **134**, 2126–2135 (2014).
36. Wirsing, A. M., Rikardsen, O. G., Steigen, S. E., Uhlin-Hansen, L. & Hadler-Olsen, E. Characterisation and prognostic value of tertiary lymphoid structures in oral squamous cell carcinoma. *BMC Clin Pathol* **14**, 38 (2014).
37. Yamaguchi, K. *et al.* Helper T cell-dominant tertiary lymphoid structures are associated with disease relapse of advanced colorectal cancer. *Oncoimmunology* **9**, 1724763 (2020).
38. Zou, Y., Zhao, J., Huang, F., Xiang, X. & Xia, Y. Decreased Tertiary Lymphoid Structures in Lung Adenocarcinomas with ALK Rearrangements. *J Clin Med* **11**, 5935 (2022).
39. Zhang, T. *et al.* Peritumor tertiary lymphoid structures are associated with infiltrating neutrophils and inferior prognosis in hepatocellular carcinoma. *Cancer Med* **12**, 3068–3078 (2023).
40. García-Hernández, M. de la L. *et al.* A Unique Cellular and Molecular Microenvironment Is Present in Tertiary Lymphoid Organs of Patients with Spontaneous Prostate Cancer Regression. *Front Immunol* **8**, (2017).
41. Germain, C. *et al.* Presence of B cells in tertiary lymphoid structures is associated with a protective immunity in patients with lung cancer. *Am J Respir Crit Care Med* **189**, 832–844 (2014).
42. Goc, J. *et al.* Dendritic cells in tumor-associated tertiary lymphoid structures signal a Th1 cytotoxic immune contexture and license the positive prognostic value of infiltrating CD8+ T cells. *Cancer Res* **74**, 705–715 (2014).
43. Gottlin, E. B. *et al.* The Association of Intratumoral Germinal Centers with early-stage non-small cell lung cancer. *J Thorac Oncol* **6**, 1687–1690 (2011).
44. Gu-Trantien, C. *et al.* CD4(+) follicular helper T cell infiltration predicts breast cancer survival. *J Clin Invest* **123**, 2873–2892 (2013).
45. He, W. *et al.* The High Level of Tertiary Lymphoid Structure Is Correlated With Superior Survival in Patients With Advanced Gastric Cancer. *Front Oncol* **10**, (2020).
46. Hennequin, A. *et al.* Tumor infiltration by Tbet+ effector T cells and CD20+ B cells is associated with survival in gastric cancer patients. *Oncoimmunology* **5**, e1054598 (2016).
47. Lee, M. *et al.* Presence of tertiary lymphoid structures determines the level of tumor-infiltrating lymphocytes in primary breast cancer and metastasis. *Modern Pathology* **32**, 70–80 (2019).
48. Li, H. *et al.* Existence of intratumoral tertiary lymphoid structures is associated with immune cells infiltration and predicts better prognosis in early-stage hepatocellular carcinoma. *Aging* **12**, 3451–3472 (2020).

49. McMullen, T. P., Lai, R., Dabbagh, L., Wallace, T. M. & de Gara, C. J. Survival in rectal cancer is predicted by T cell infiltration of tumour-associated lymphoid nodules. *Clin Exp Immunol* **161**, 81–88 (2010).
50. Montfort, A. *et al.* A Strong B-cell Response Is Part of the Immune Landscape in Human High-Grade Serous Ovarian Metastases. *Clinical Cancer Research* **23**, 250–262 (2017).
51. Nie, Y. *et al.* Tertiary lymphoid structures: Associated multiple immune cells and analysis their formation in hepatocellular carcinoma. *The FASEB Journal* **36**, (2022).
52. Remark, R. *et al.* Immune contexture and histological response after neoadjuvant chemotherapy predict clinical outcome of lung cancer patients. *Oncoimmunology* **5**, e1255394 (2016).
53. Schweiger, T. *et al.* Tumor-infiltrating lymphocyte subsets and tertiary lymphoid structures in pulmonary metastases from colorectal cancer. *Clin Exp Metastasis* **33**, 727–739 (2016).
54. Song, I. H. *et al.* Predictive Value of Tertiary Lymphoid Structures Assessed by High Endothelial Venule Counts in the Neoadjuvant Setting of Triple-Negative Breast Cancer. *Cancer Res Treat* **49**, 399–407 (2017).
55. Tang, J. *et al.* B Cells and Tertiary Lymphoid Structures Influence Survival in Lung Cancer Patients with Resectable Tumors. *Cancers (Basel)* **12**, 2644 (2020).
56. Wada, Y., Nakashima, O., Kutami, R., Yamamoto, O. & Kojiro, M. Clinicopathological study on hepatocellular carcinoma with lymphocytic infiltration. *Hepatology* **27**, 407–414 (1998).



**Supplementary table 2 | TLS in human kidney diseases**

| Definition of TLS                                           | Frequency (TLS positive patients/total patients)                 | Clinical findings                                                                                                                                                                                                 | Ref |
|-------------------------------------------------------------|------------------------------------------------------------------|-------------------------------------------------------------------------------------------------------------------------------------------------------------------------------------------------------------------|-----|
| IgA nephropathy*                                            |                                                                  |                                                                                                                                                                                                                   |     |
| Clusters containing CD4/CD8/CD20/DC-SIGN <sup>+</sup> cells | 38.8% (59/152)                                                   | TLS <sup>+</sup> patients had higher sCr, proteinuria, BP and more severe glomerulonephritis than TLS <sup>-</sup> patients                                                                                       | 1   |
| T and B cell aggregates                                     | 31.4% (328/1044)                                                 | TLS frequency correlated with risk of 50% decline in eGFR or kidney failure in patients with eGFR<60 ml/min/1.73 m <sup>2</sup> ; TLS predicted IgAN progression in earlier stage disease                         | 2   |
| Membranous nephropathy*                                     |                                                                  |                                                                                                                                                                                                                   |     |
| T and B cell aggregates                                     | 34.2% (151/442)                                                  | TLS+ patients had higher sCr, proteinuria and BP, lower serum albumin, and lower remission rate than TLS- patients; TLSs were associated with anti-PLA2R antibody; TLS+ patients were older and frequently male   | 3   |
| Lupus nephritis*                                            |                                                                  |                                                                                                                                                                                                                   |     |
| T and B cell aggregates                                     | 31.3% (10/32)                                                    | In a few patients, follow-up biopsy samples showed mature TLSs despite immunosuppressive treatment                                                                                                                | 4   |
| T and B cell aggregates with FDCs                           | 12.5% (4/32)                                                     |                                                                                                                                                                                                                   |     |
| T and B cell aggregates                                     | 51.4% (35/68)                                                    | The presence of TLS was associated with clonal expansion, somatic hypermutation and immune complex deposition in tubular basement membranes                                                                       | 5   |
| T and B cell aggregates with germinal centre                | 5.9% (4/68)                                                      |                                                                                                                                                                                                                   |     |
| ANCA-associated glomerulonephritis*                         |                                                                  |                                                                                                                                                                                                                   |     |
| T and B cell aggregates                                     | 31.3% (5/16)                                                     | No clinical findings were reported.                                                                                                                                                                               | 4   |
| T and B cell aggregates with FDCs                           | 6.3% (1/16)                                                      |                                                                                                                                                                                                                   |     |
| T and B cell aggregates                                     | 47.4% (53/112)                                                   | The presence of TLS was associated with higher risk of AKI requiring dialysis and kidney failure                                                                                                                  | 6   |
| T and B cell aggregates with nodular B cell aggregates      | 13.4% (15/112)                                                   |                                                                                                                                                                                                                   |     |
| Acute kidney allograft rejection*                           |                                                                  |                                                                                                                                                                                                                   |     |
| B cell clusters                                             | 45.0% (9/20)                                                     | B cell density positively correlated with glucocorticoid resistance and poor graft outcomes                                                                                                                       | 7   |
| B cell clusters                                             | 59.2% (71/120)                                                   | The presence of TLSs was not associated with time to ACR, steroid resistance, sCr or graft loss                                                                                                                   | 8   |
| Clinically stable kidney allografts*                        |                                                                  |                                                                                                                                                                                                                   |     |
| T and B cell aggregates with signs of proliferation         | 0 months: 3.8% (8/210); 1 month: 46.9% (90/192); 6 months: 53.4% | The presence of TLS with FDCs in allografts at 1-year biopsy was associated with higher risk of kidney function decline after transplantation compared with allografts without TLS or those with TLSs but no FDCs | 9   |

|                                                              |                                                                                                   |                                     |    |
|--------------------------------------------------------------|---------------------------------------------------------------------------------------------------|-------------------------------------|----|
|                                                              | (87/163) 12 months:<br>53.4% (108/185)                                                            |                                     |    |
| T and B cell aggregates with signs of proliferation and FDCs | 0 months: 1.4% (3/210); 1 month: 3.6% (7/192); 6 months: 8.6% (14/163); 12 months: 18.9% (35/185) |                                     |    |
| <b>Kidney allografts with chronic rejection<sup>‡</sup></b>  |                                                                                                   |                                     |    |
| B cell clusters with FDCs                                    | 95% (19/20)                                                                                       | No clinical findings were reported. | 10 |
| <b>Complicated pyelonephritic kidneys<sup>‡</sup></b>        |                                                                                                   |                                     |    |
| T and B cell aggregates with sign of proliferation           | 100.0% (16/16)                                                                                    | No clinical findings were reported. | 11 |

\*Needle biopsy samples; <sup>‡</sup>Surgically resected kidneys. sCr, serum creatinine; BP, blood pressure; PLA2R, phospholipase A2 receptor; FDCs, follicular dendritic cells; ANCA, Antineutrophil Cytoplasmic Antibody; AKI, acute kidney injury; ACR, acute cellular rejection; BCR, B cell receptor; CKD, chronic kidney disease.

#### Reference

1. Pei, G. *et al.* Renal interstitial infiltration and tertiary lymphoid organ neogenesis in IgA nephropathy. *Clin J Am Soc Nephrol* **9**, 255-264 (2014).
2. Luo, R. *et al.* Tertiary lymphoid organs are associated with the progression of kidney damage and regulated by interleukin-17A. *Theranostics* **11**, 117-131 (2021).
3. Wang, Z.F. *et al.* Characteristics and Prognostic Value of Tertiary Lymphoid Organs in Membranous Nephropathy: A Retrospective Study. *Front Med (Lausanne)* **8**, 803929 (2021).
4. Steinmetz, O.M. *et al.* Analysis and classification of B-cell infiltrates in lupus and ANCA-associated nephritis. *Kidney Int* **74**, 448-457 (2008).
5. Chang, A. *et al.* In situ B cell-mediated immune responses and tubulointerstitial inflammation in human lupus nephritis. *J Immunol* **186**, 1849-1860 (2011).
6. Brix, S.R. *et al.* Organisation of lymphocytic infiltrates in ANCA-associated glomerulonephritis. *Histopathology* **72**, 1093-1101 (2018).
7. Sarwal, M. *et al.* Molecular heterogeneity in acute renal allograft rejection identified by DNA microarray profiling. *N Engl J Med* **349**, 125-138 (2003).
8. Kayler, L.K. *et al.* Acute cellular rejection with CD20-positive lymphoid clusters in kidney transplant patients following lymphocyte depletion. *Am J Transplant* **7**, 949-954 (2007).
9. Lee, Y.H. *et al.* Advanced Tertiary Lymphoid Tissues in Protocol Biopsies are Associated with Progressive Graft Dysfunction in Kidney Transplant Recipients. *J Am Soc Nephrol* **33**, 186-200

(2022).

10. Thaunat, O. *et al.* Chronic rejection triggers the development of an aggressive intragraft immune response through recapitulation of lymphoid organogenesis. *J Immunol* **185**, 717-728 (2010).
11. Sato, Y. *et al.* Developmental stages of tertiary lymphoid tissue reflect local injury and inflammation in mouse and human kidneys. *Kidney Int* **98**, 448-463 (2020).
